# Supplementary material for: Mesomorphic phenanthroline derivatives: novel architectures based on hydrogen bondingElectronic supplementary information (ESI) available: FT-IR spectra of compounds L12 and 1′16 and X-ray diffraction pattern of the palladium complex of L16. See http://www.rsc.org/suppdata/cc/b1/b110239g/
Source: Royal Society of Chemistry journal article supplement (doi:10.1039/b110239g), 2002-06-24
Supplement: b110239g.pdf [file b110239g.pdf]

# Mesomorphic Phenanthroline Derivatives : Novel Architectures based on Hydrogen Bonding

Guillaume Pickaert,<sup>a</sup> Laurent Douce,<sup>a</sup> Raymond Ziessel,<sup>\*a</sup> and Daniel Guillon<sup>b</sup>

## Supporting Information

**Figure S1.** FT-IR spectra (from 1400 to 1750  $\text{cm}^{-1}$ ), recorded for compound **L**<sup>12</sup> versus the temperature from 40 to 160°C. The measurements were carried out polished KBr disks starting from the crystalline to the isotropic phase.

**Figure S2.** FT-IR spectra (from 1400 to 1750  $\text{cm}^{-1}$ ), recorded for compound **1**<sup>16</sup> versus the temperature from 40 to 160°C. The measurements were carried out polished KBr disks starting from the crystalline to the isotropic phase under the same condition as for Figure S1.

**Figure S3.** X-ray diffraction pattern of the palladium complex of ligand **L**<sup>16</sup> at 70 °C and schematic representation of the packing in the smectic mesophase (Insert).
